# Supplementary material for: Dissection of additive, dominance, and imprinting effects for production and reproduction traits in Holstein cattle
Source: PubMed Central journal article supplement (PMC5450346; doi:10.1186/s12864-017-3821-4), 2017-05-30

# Manhattan plots for association of SNPs with Fat

## Additive

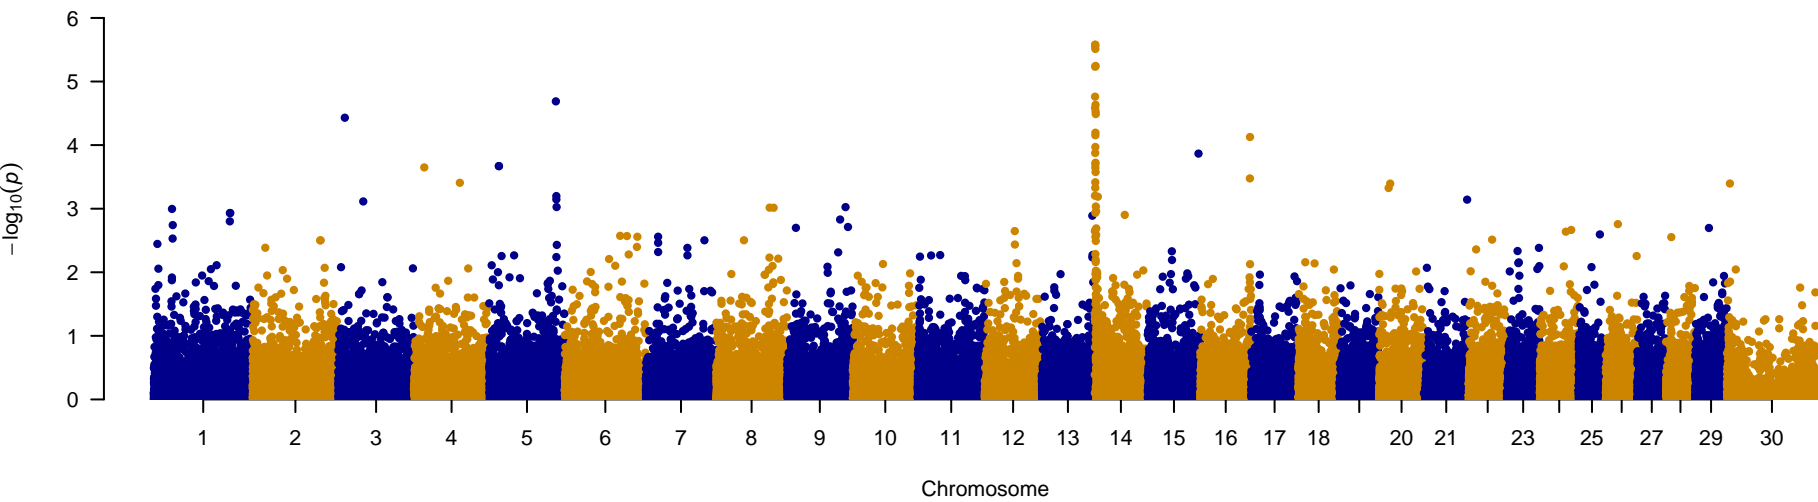

## Dominance

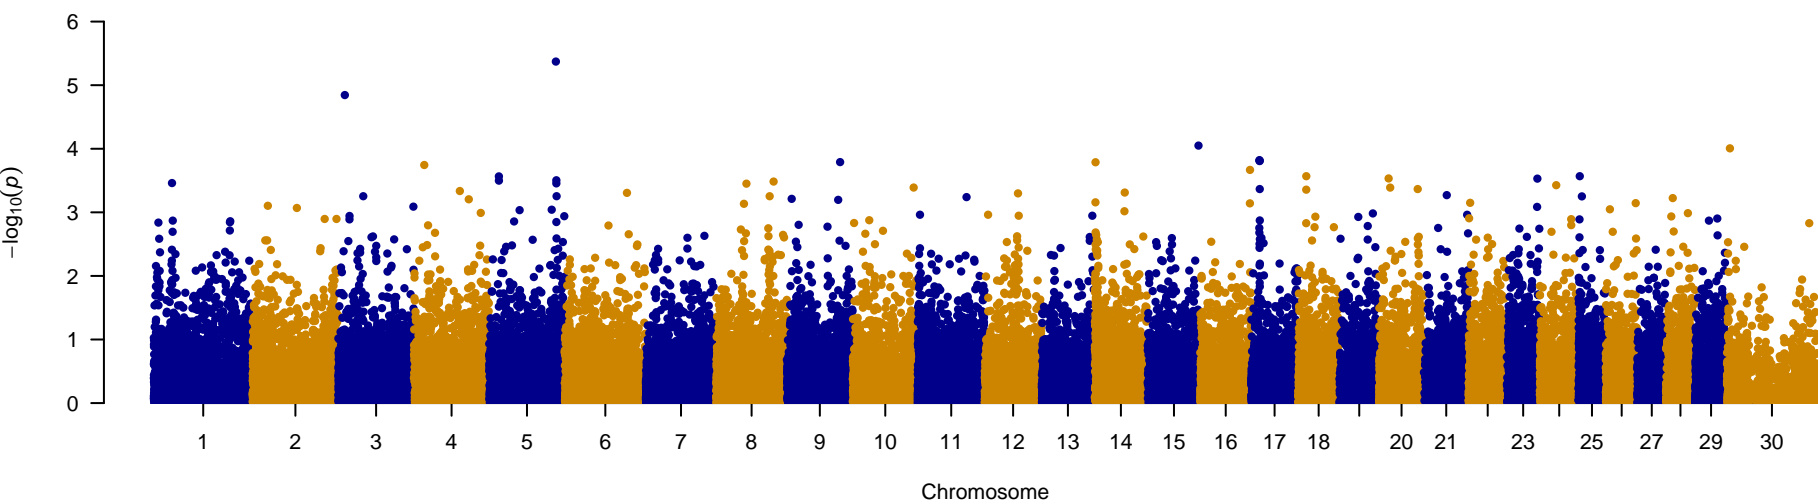

## Imprinting

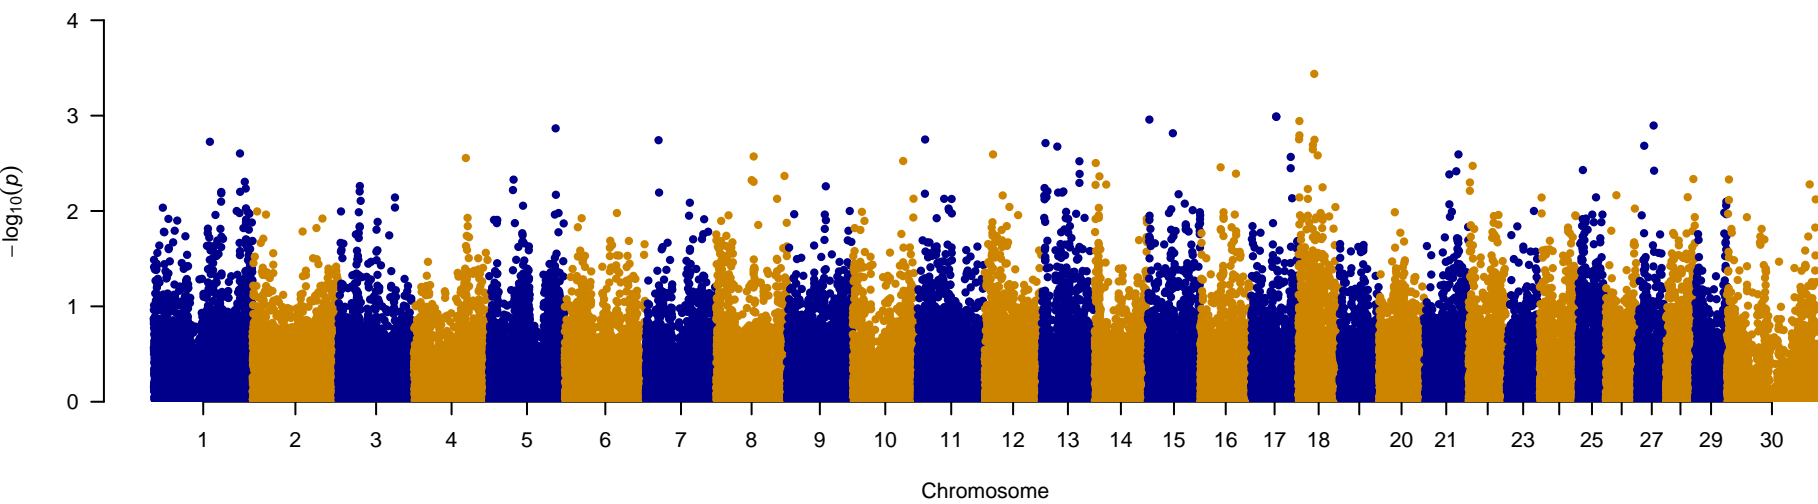

# Manhattan plots for association of SNPs with Protein

## Additive

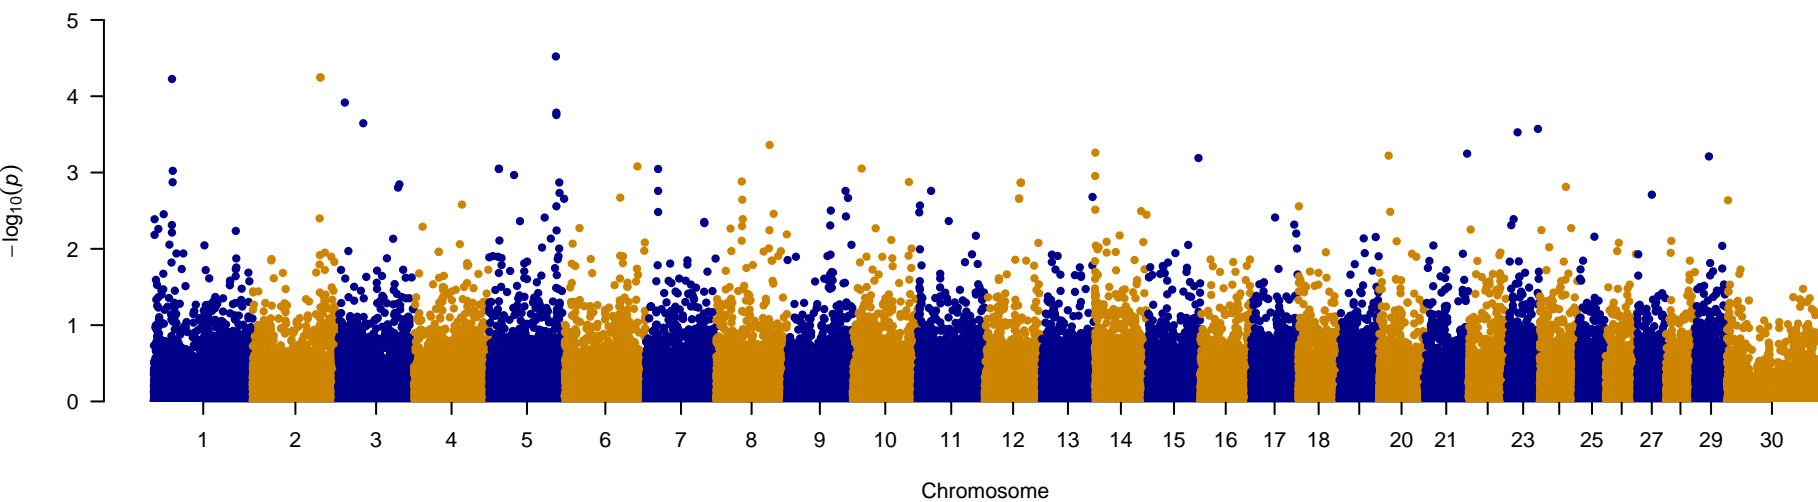

## Dominance

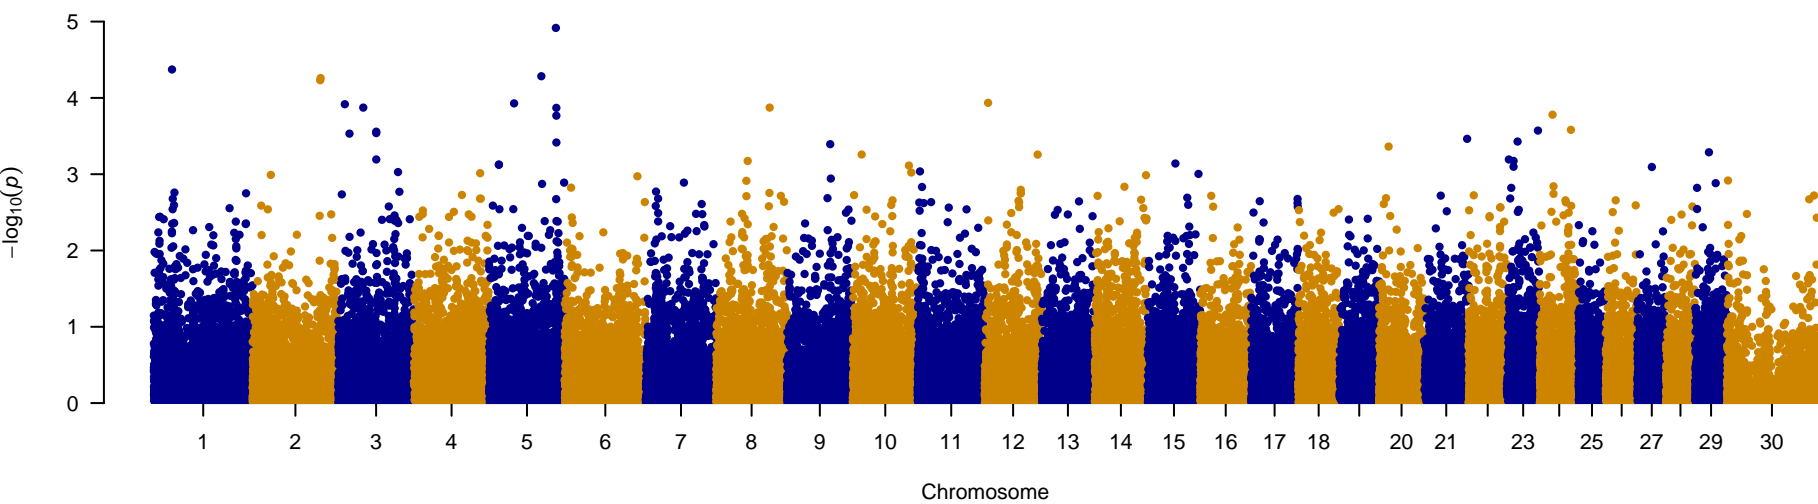

## Imprinting

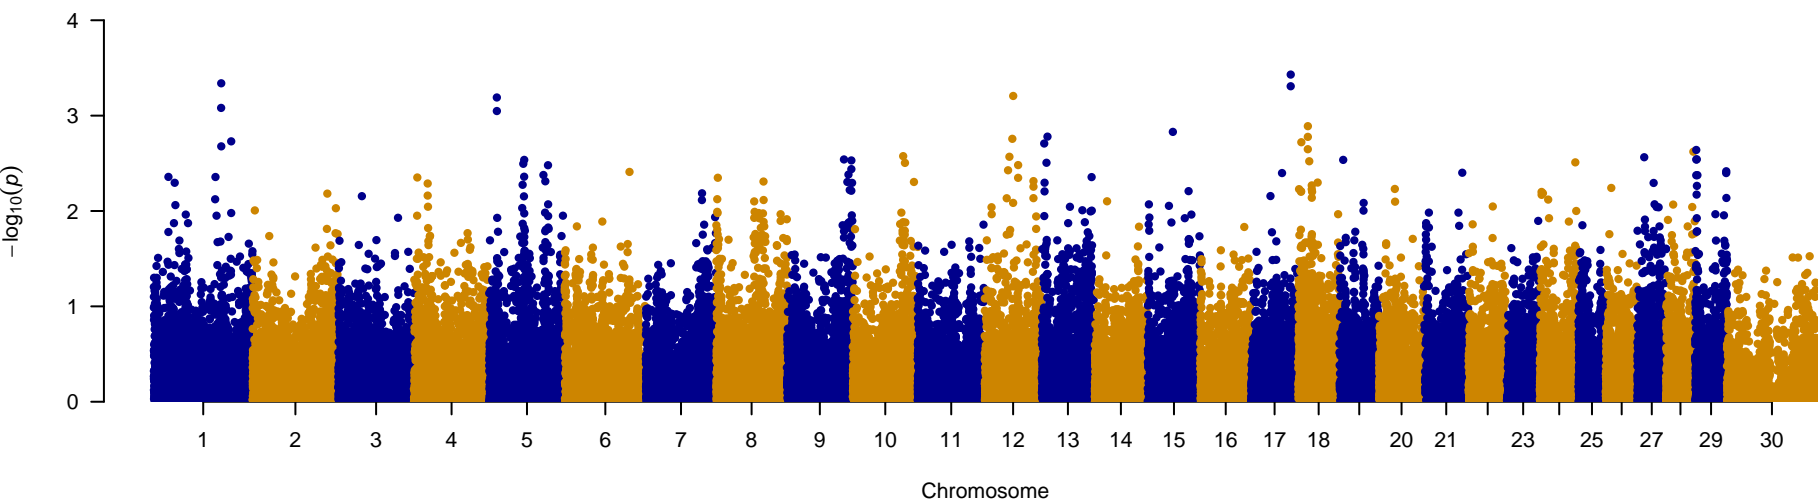

# Manhattan plots for association of SNPs with dpr

## Additive

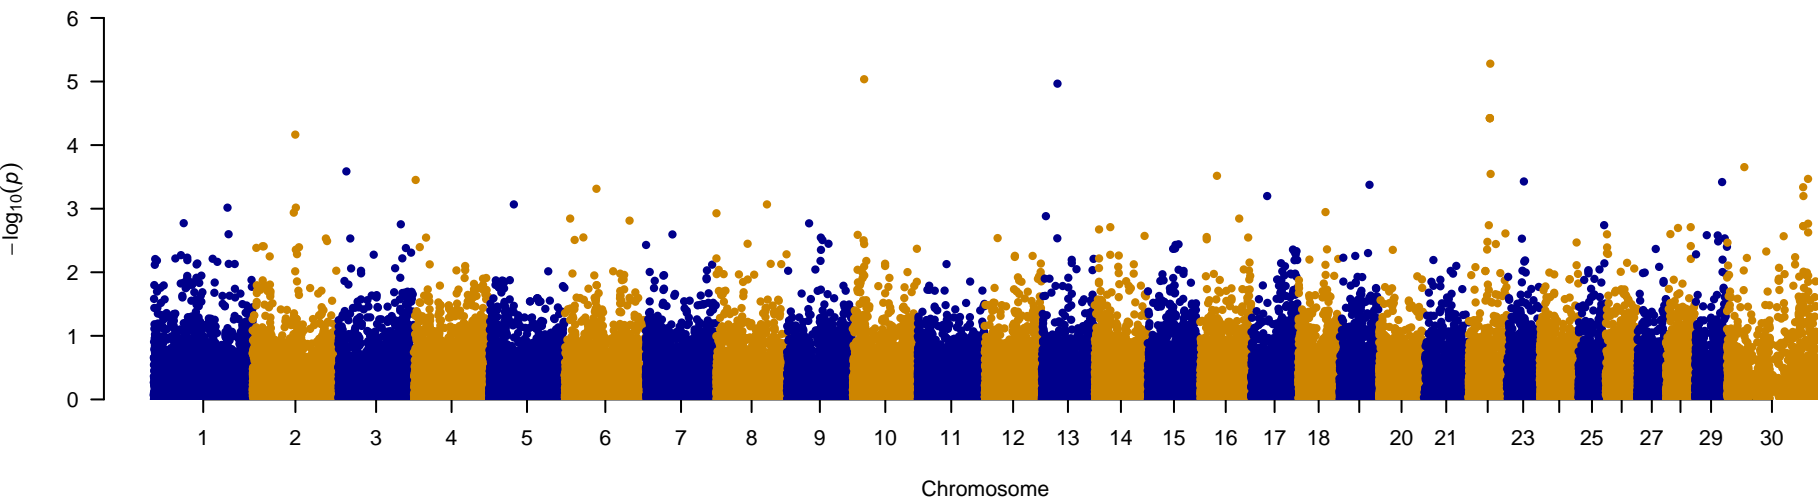

## Dominance

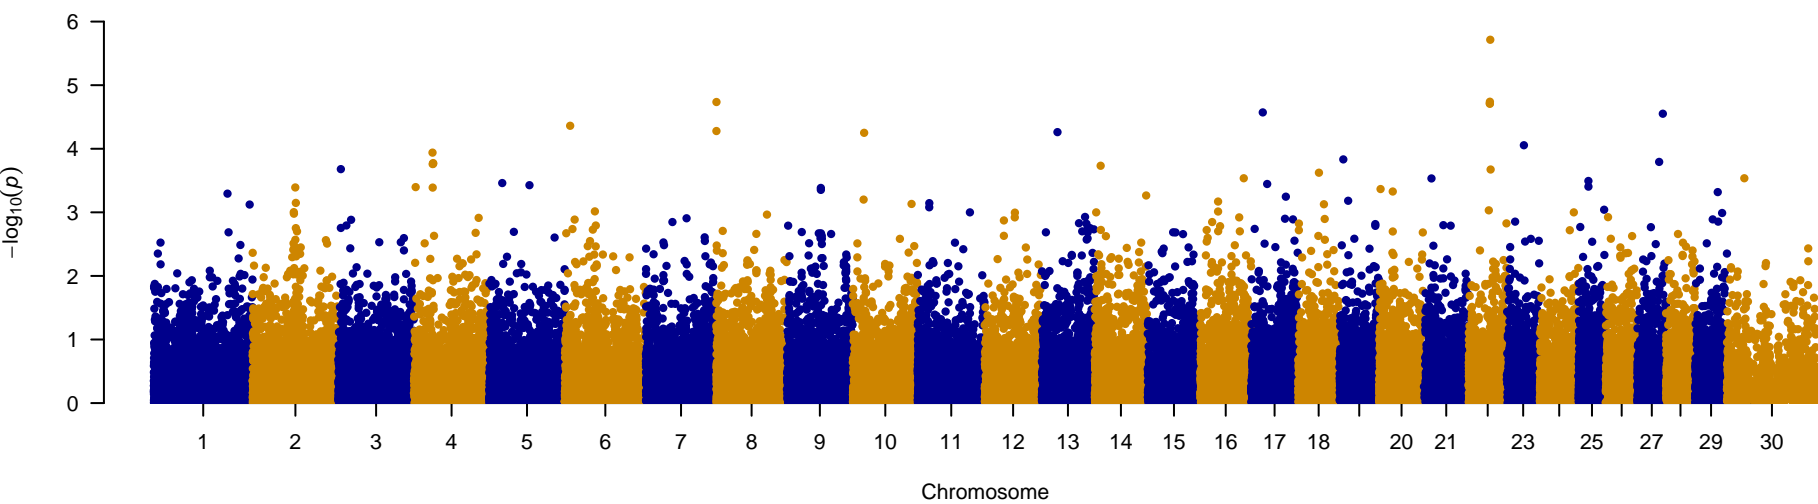

## Imprinting

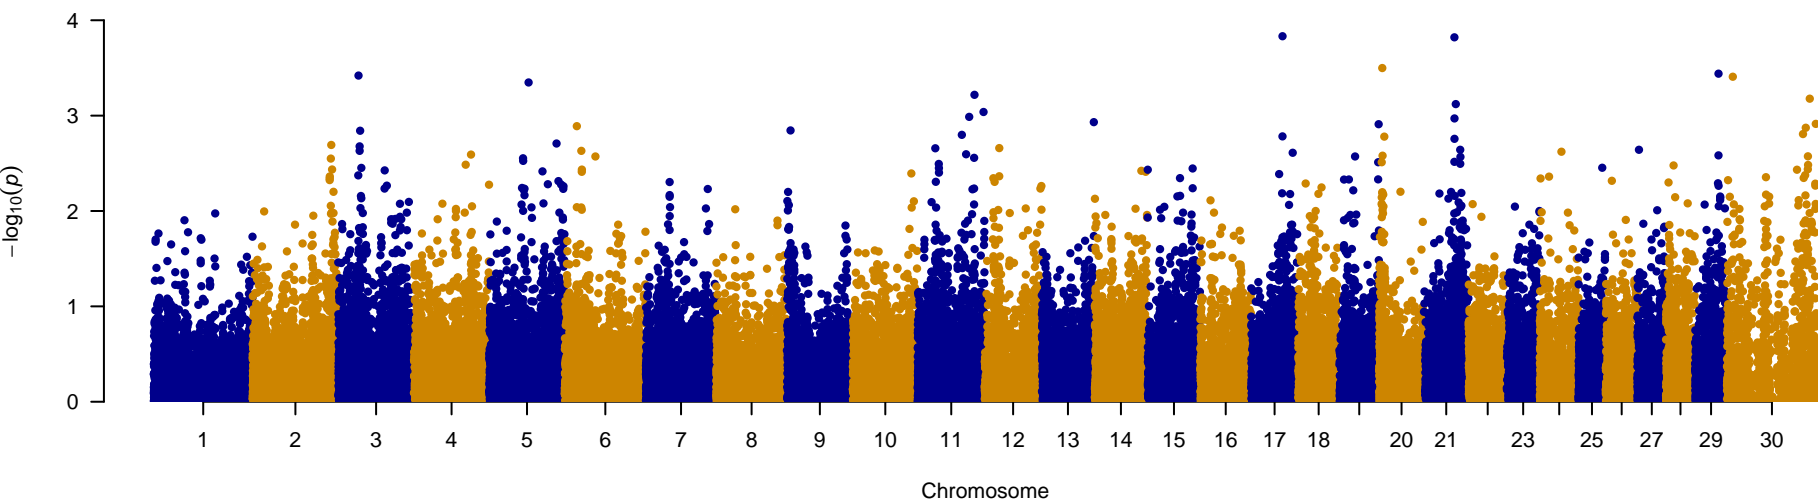

# Manhattan plots for association of SNPs with ccr

## Additive

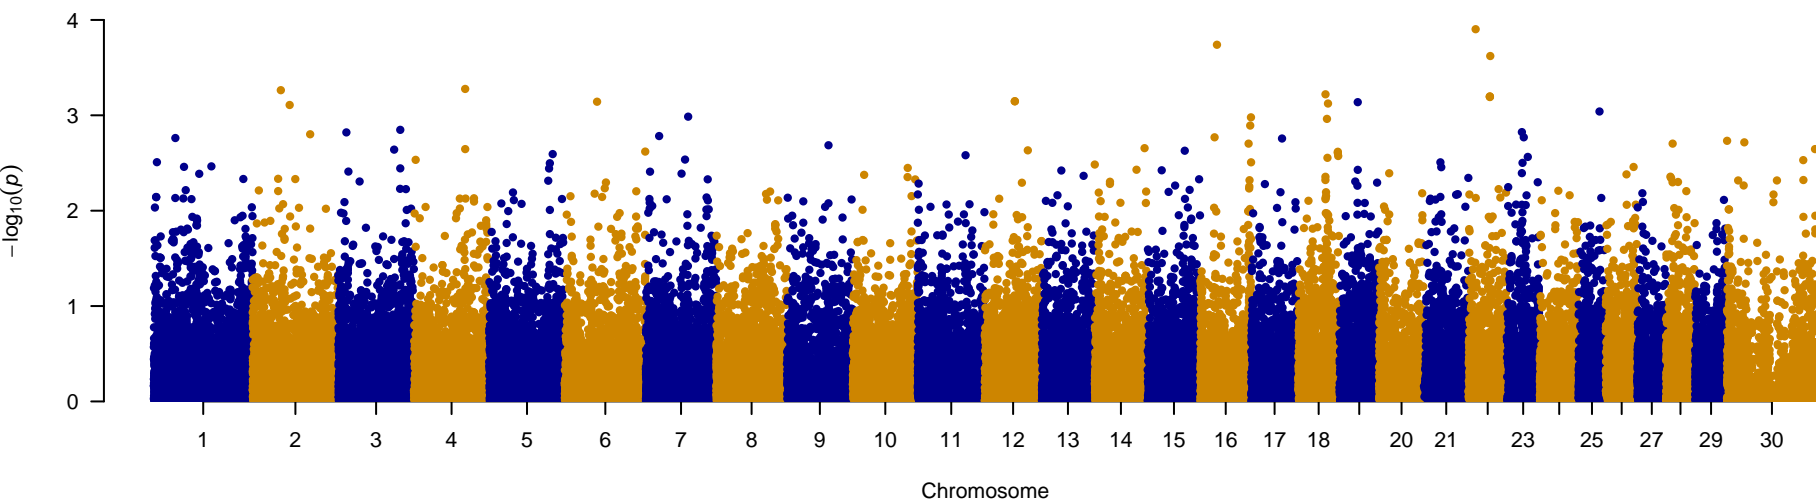

## Dominance

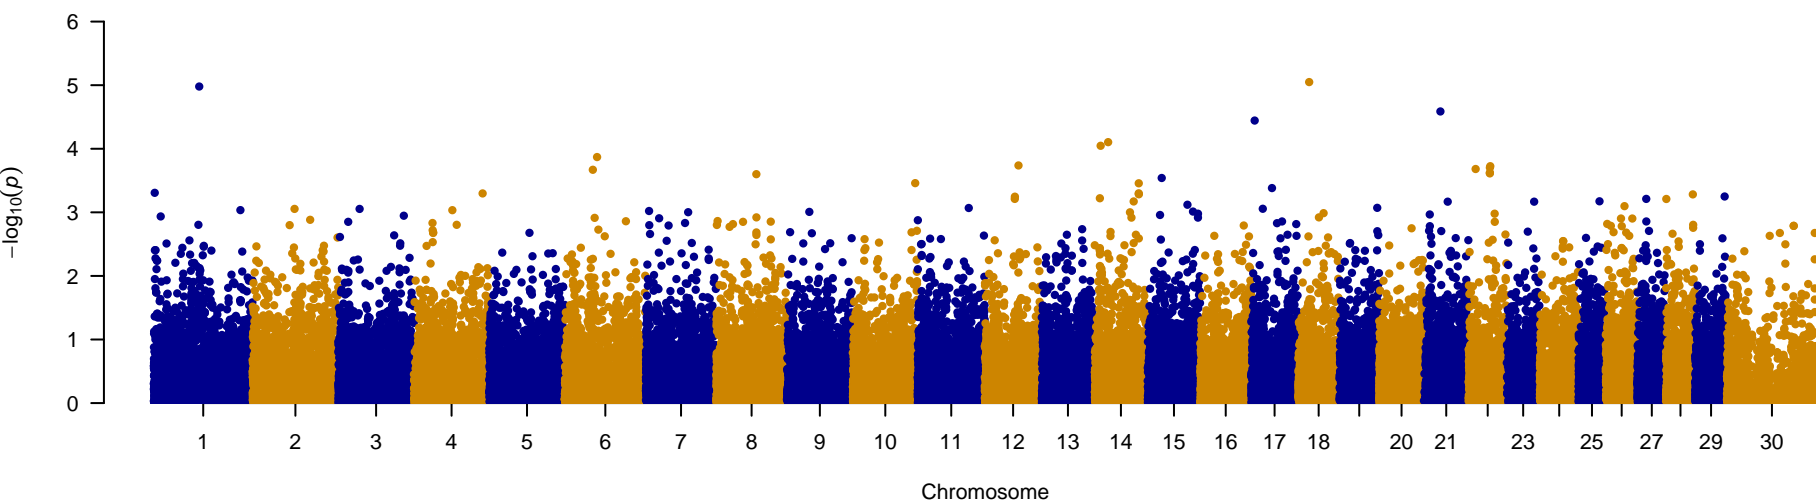

## Imprinting

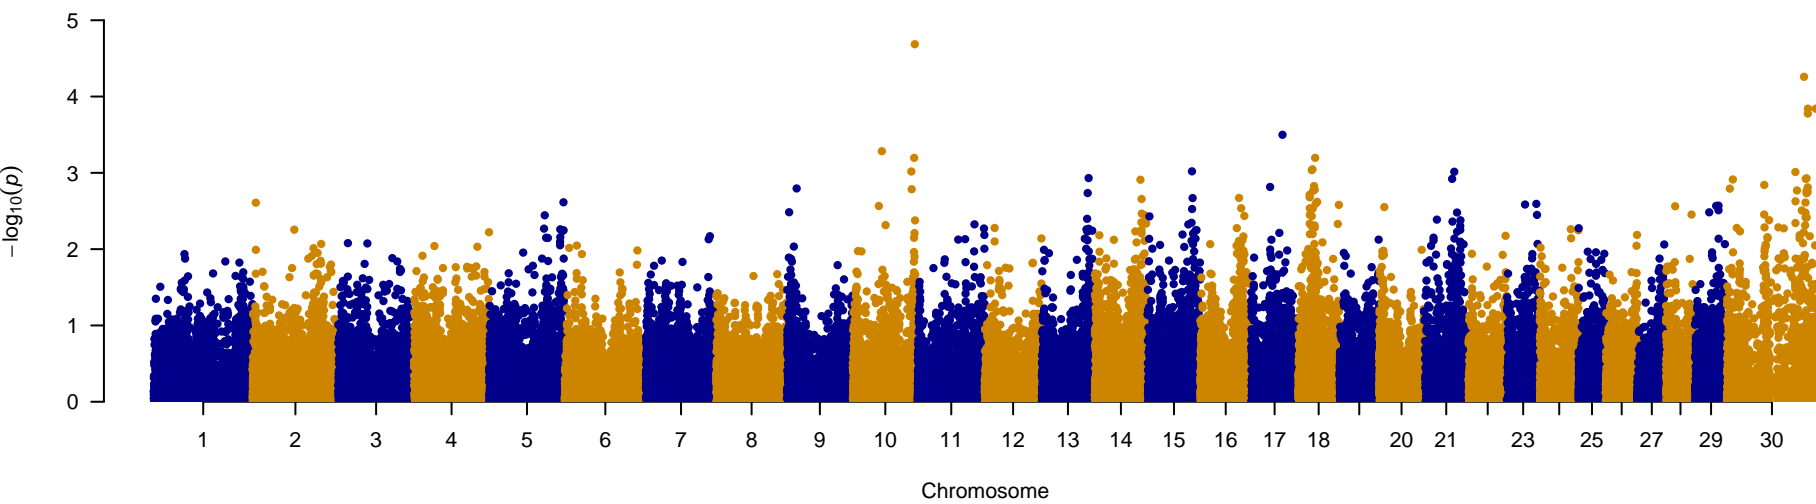

# Manhattan plots for association of SNPs with hcr

## Additive

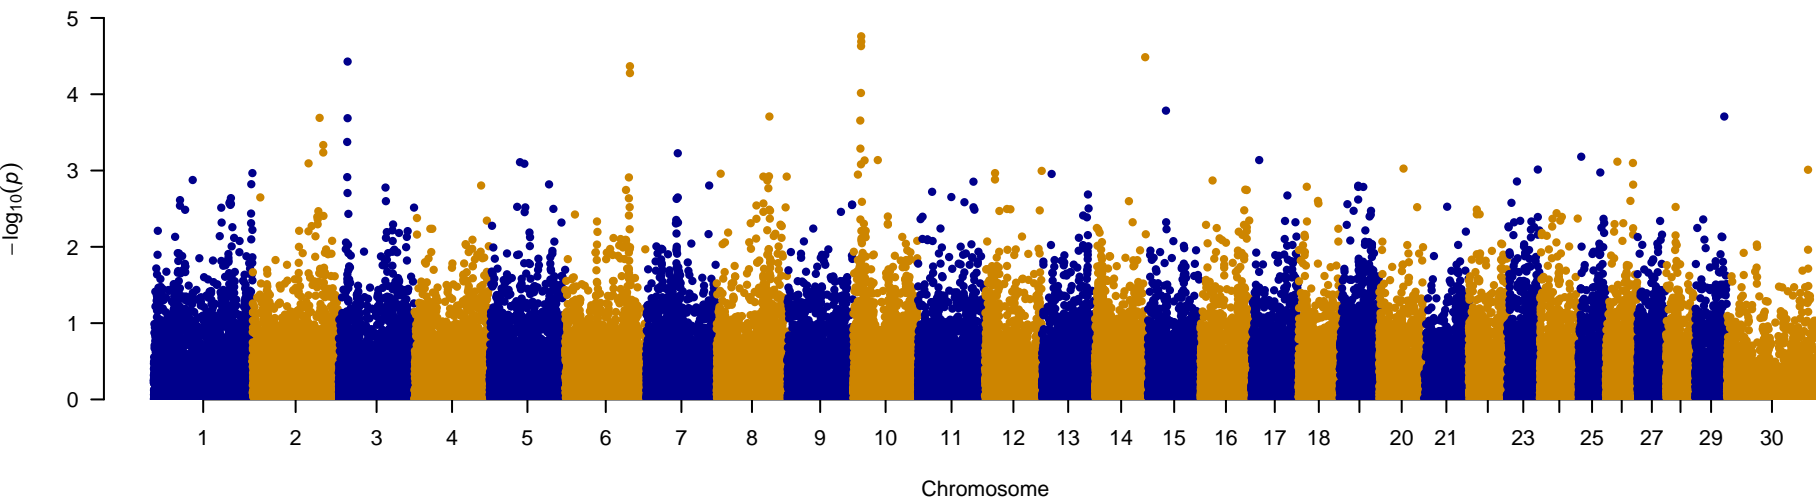

## Dominance

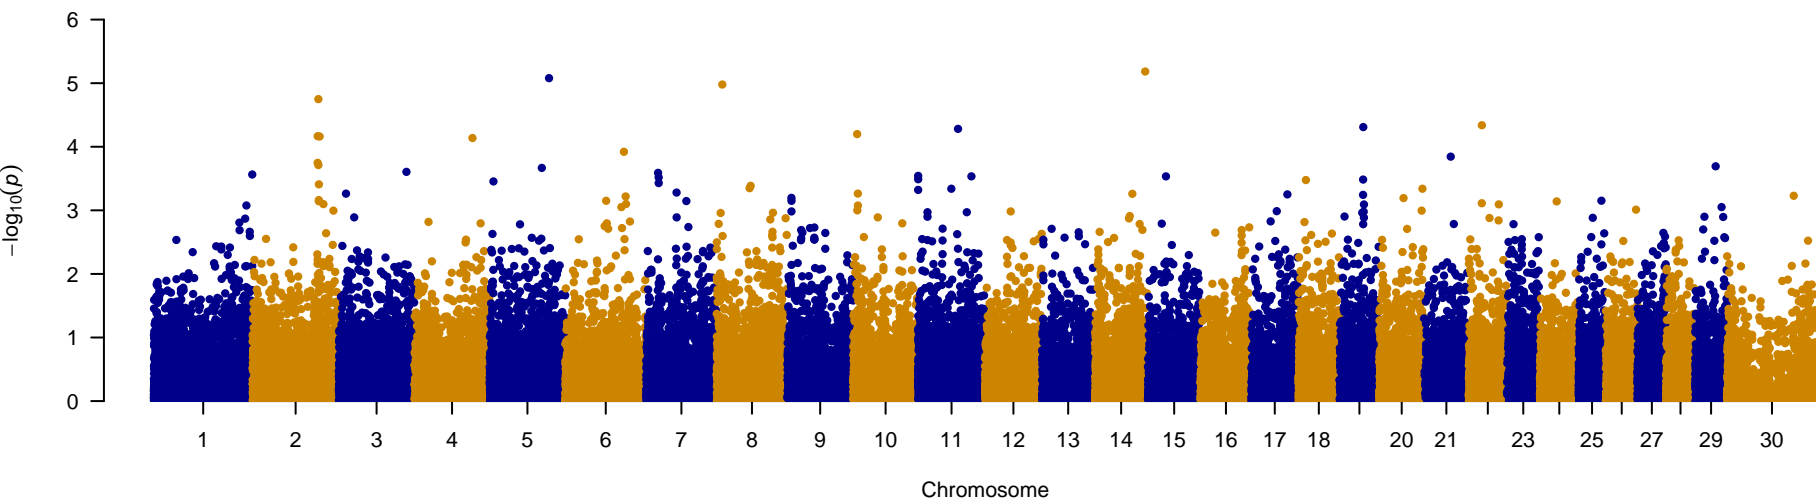

## Imprinting

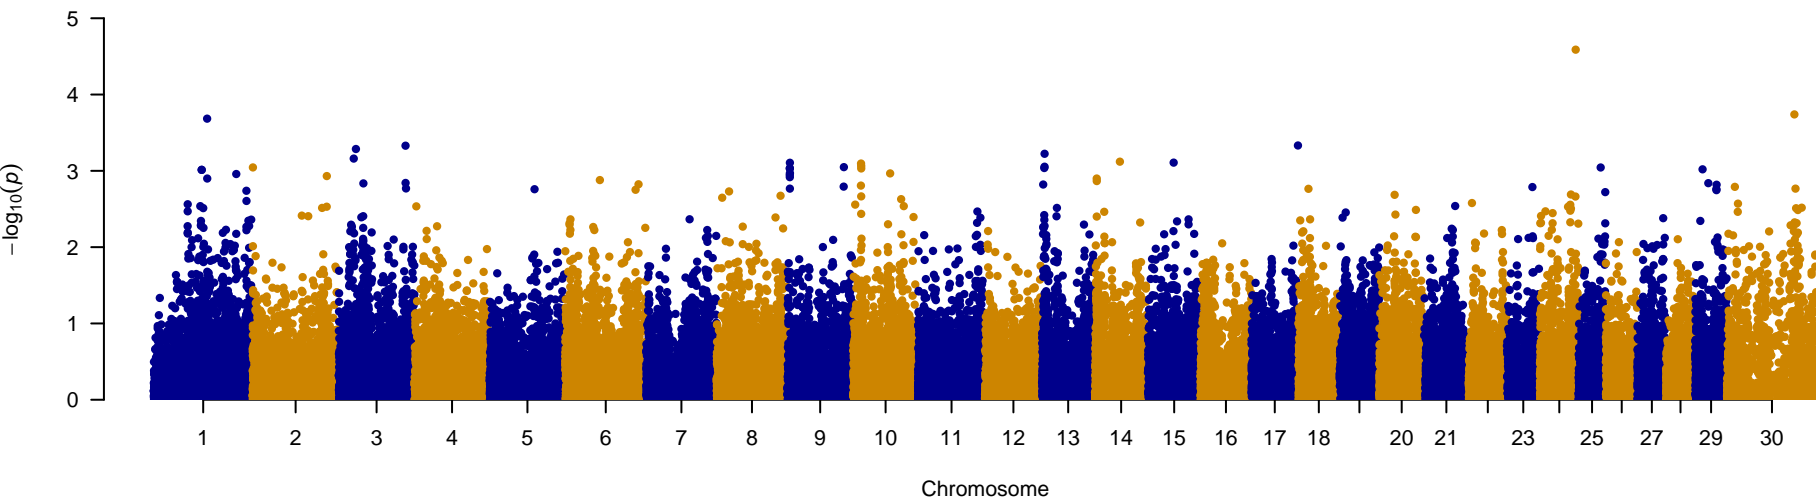

# Manhattan plots for association of SNPs with SCS

## Additive

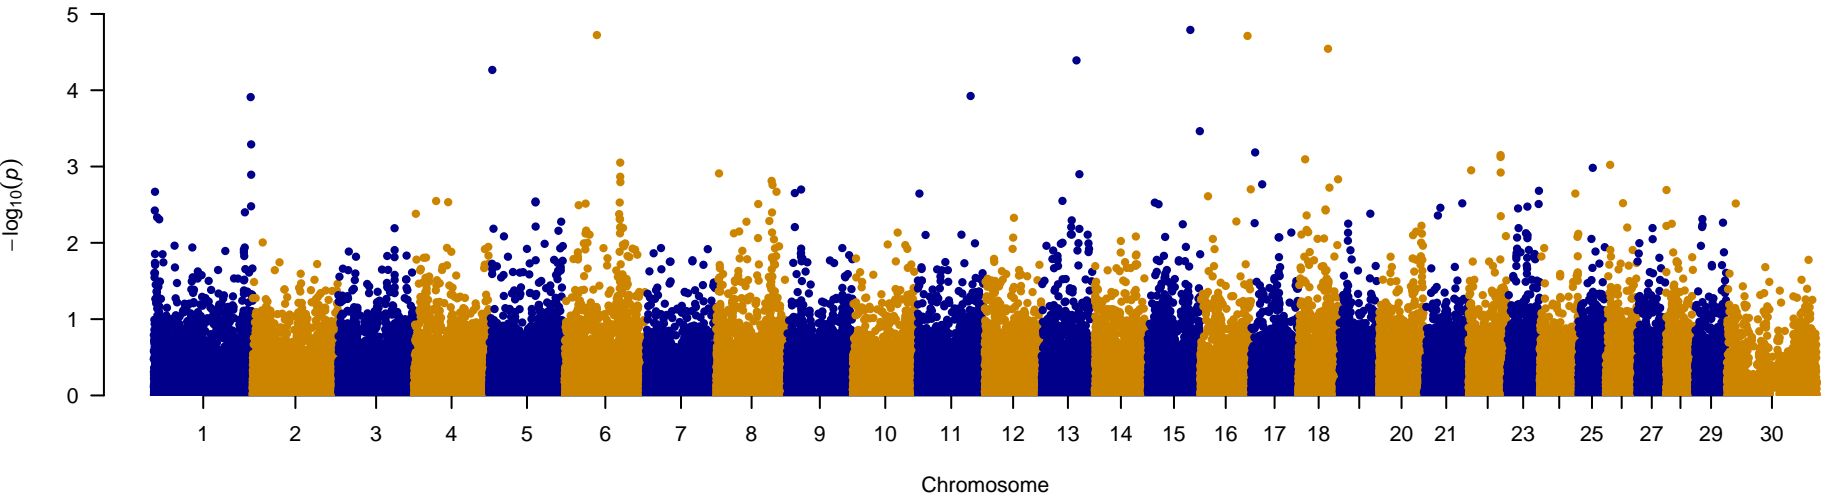

## Dominance

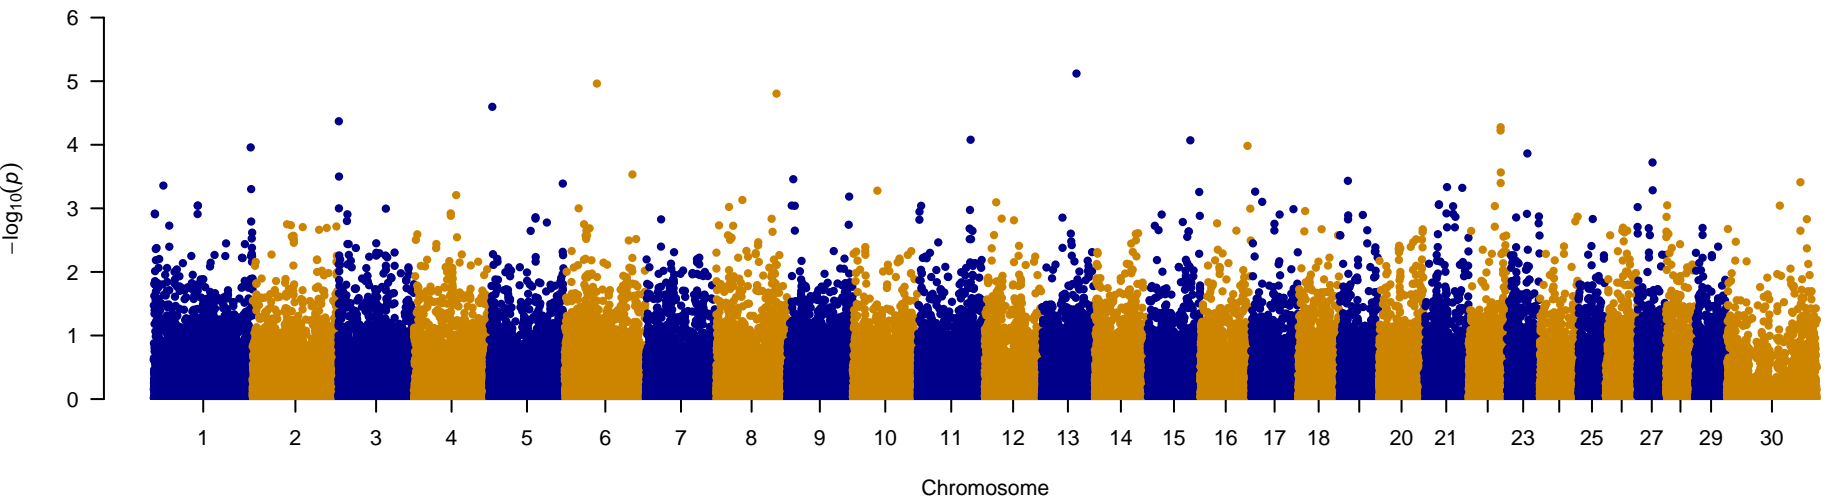

## Imprinting

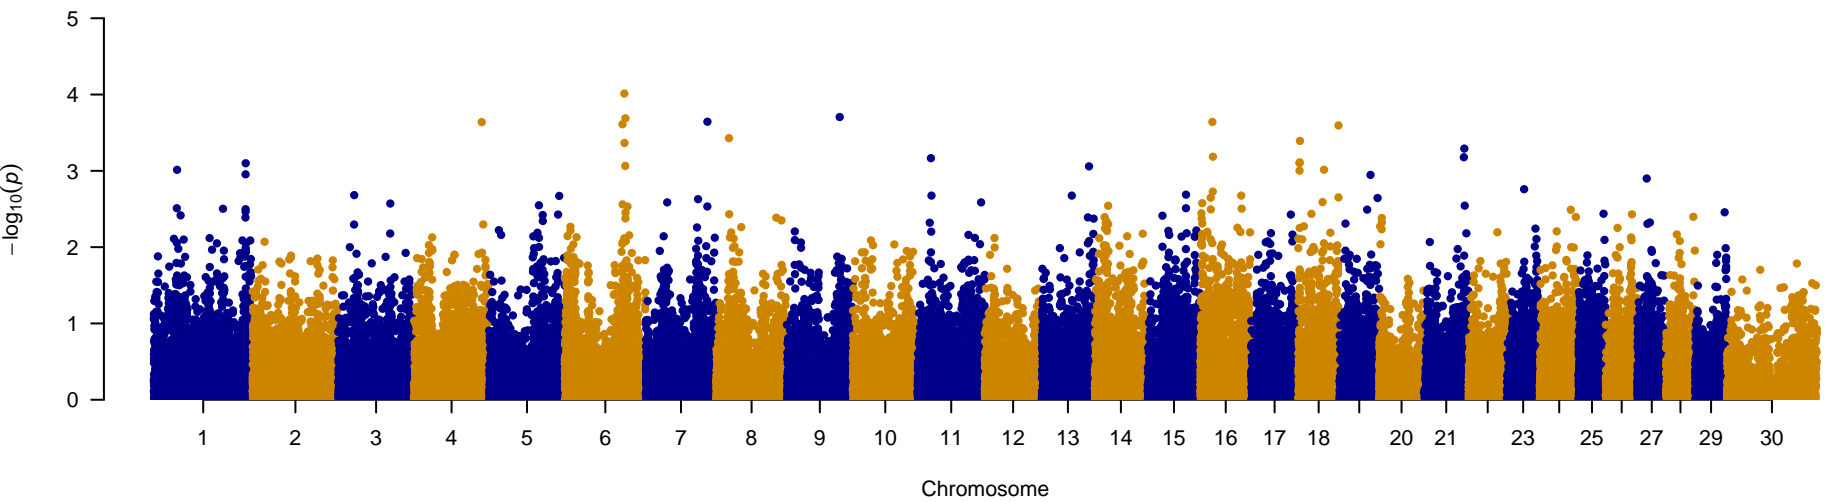

# Manhattan plots for association of SNPs with STPL

## Additive

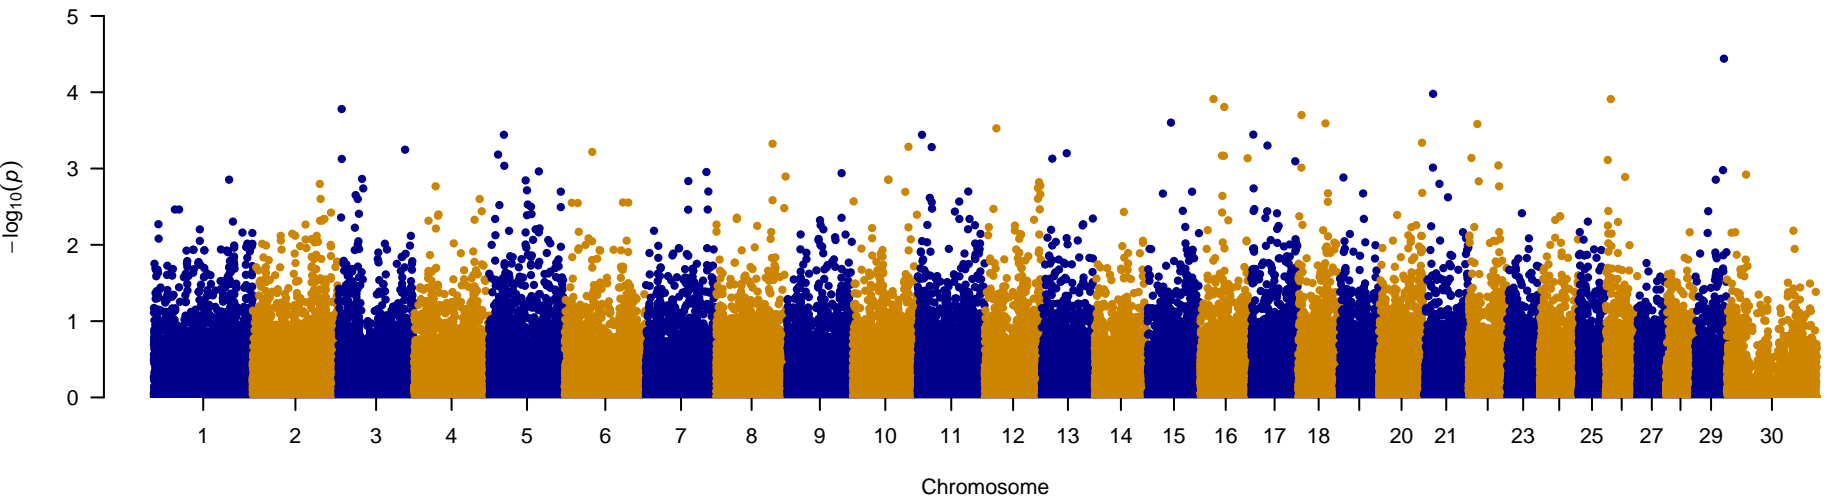

## Dominance

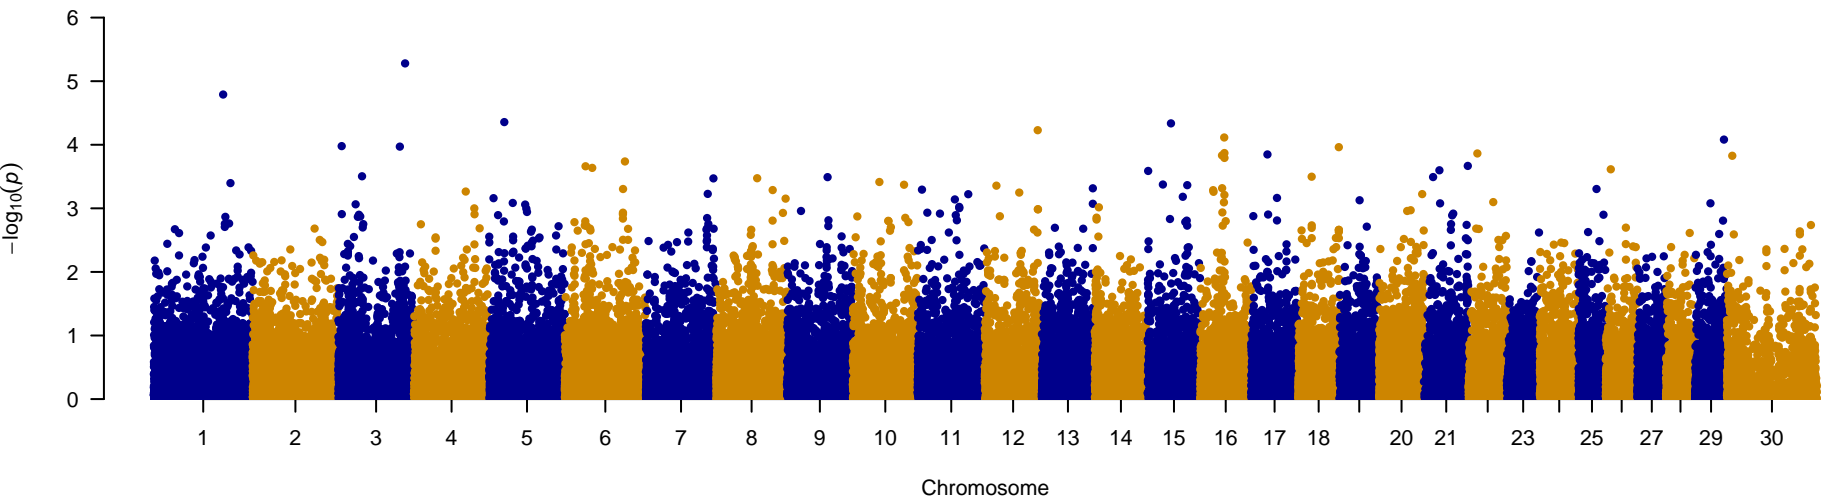

## Imprinting

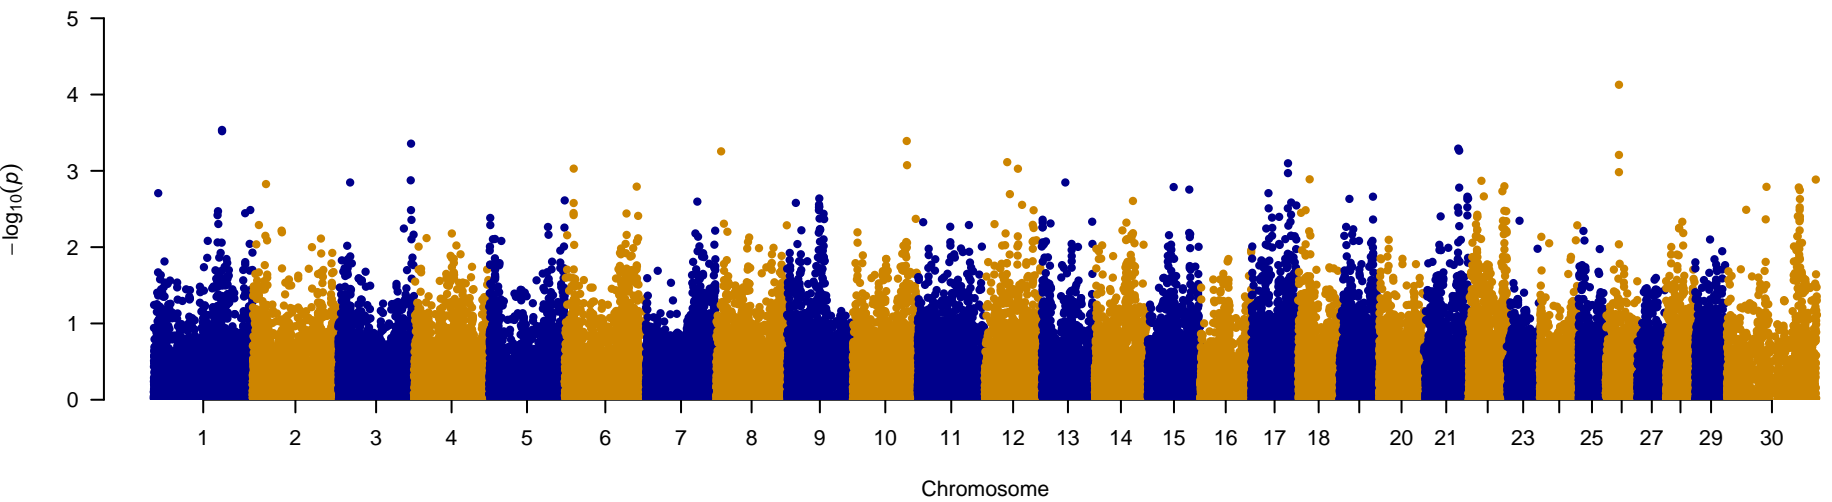

Supplement: 12864_2017_3821_MOESM4_ESM.pdf [file 12864_2017_3821_MOESM4_ESM.pdf]
