# Supplementary material for: Dissection of additive, dominance, and imprinting effects for production and reproduction traits in Holstein cattle
Source: PubMed Central journal article supplement (PMC5450346; doi:10.1186/s12864-017-3821-4), 2017-05-30

Estimates of different components with two models for fat

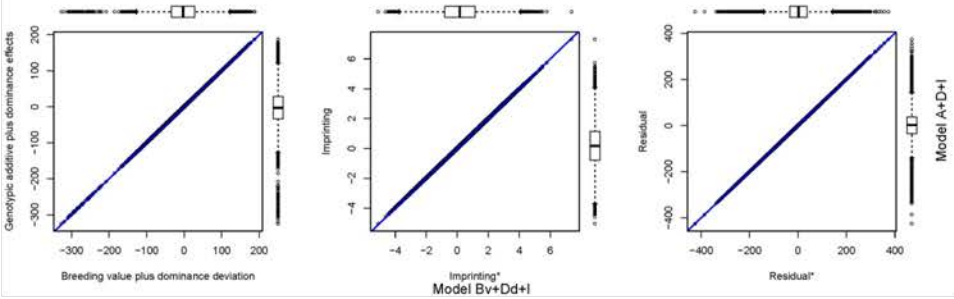

Estimates of different components with two models for protein

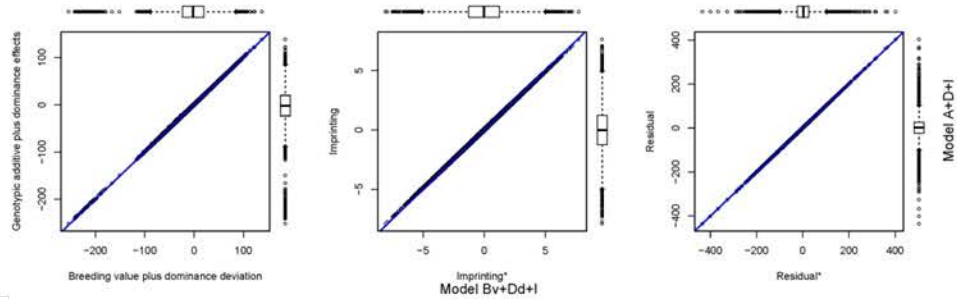

Estimates of different components with two models for CCR

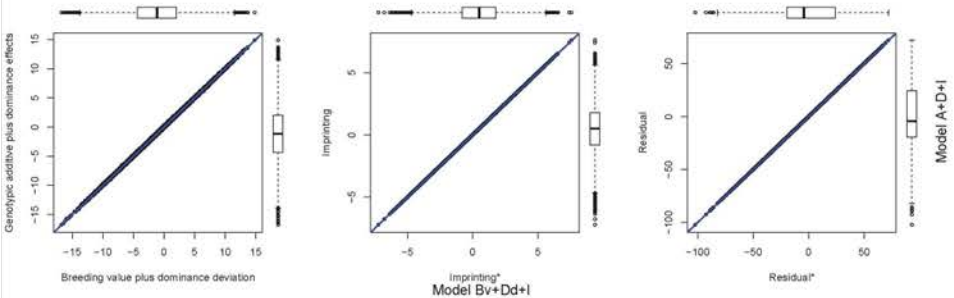

Estimates of different components with two models for HCR

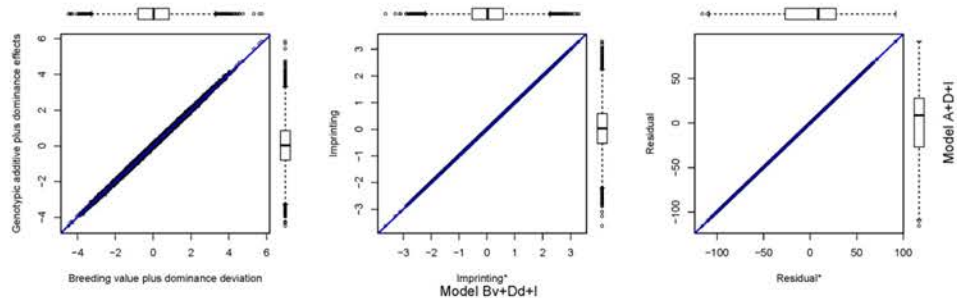

Estimates of different components with two models for DPR

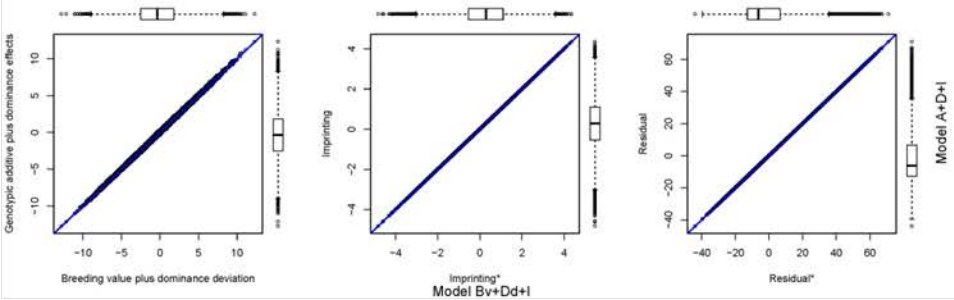

Estimates of different components with two models for SCS

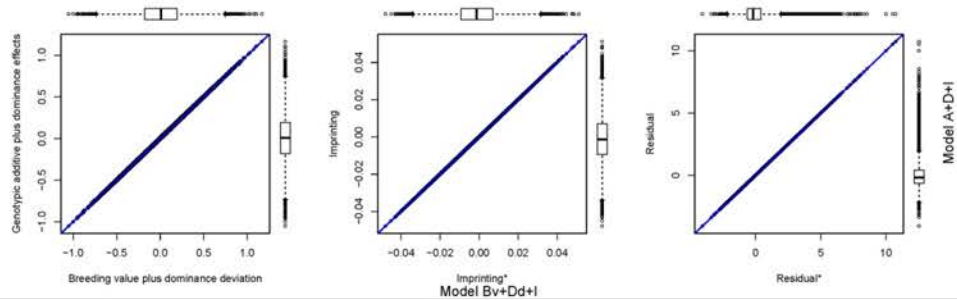

Supplement: 12864_2017_3821_MOESM2_ESM.pdf [file 12864_2017_3821_MOESM2_ESM.pdf]
