# Supplementary material for: Dissection of additive, dominance, and imprinting effects for production and reproduction traits in Holstein cattle
Source: PubMed Central journal article supplement (PMC5450346; doi:10.1186/s12864-017-3821-4), 2017-05-30

## AR2 of the imputation around RUNX2

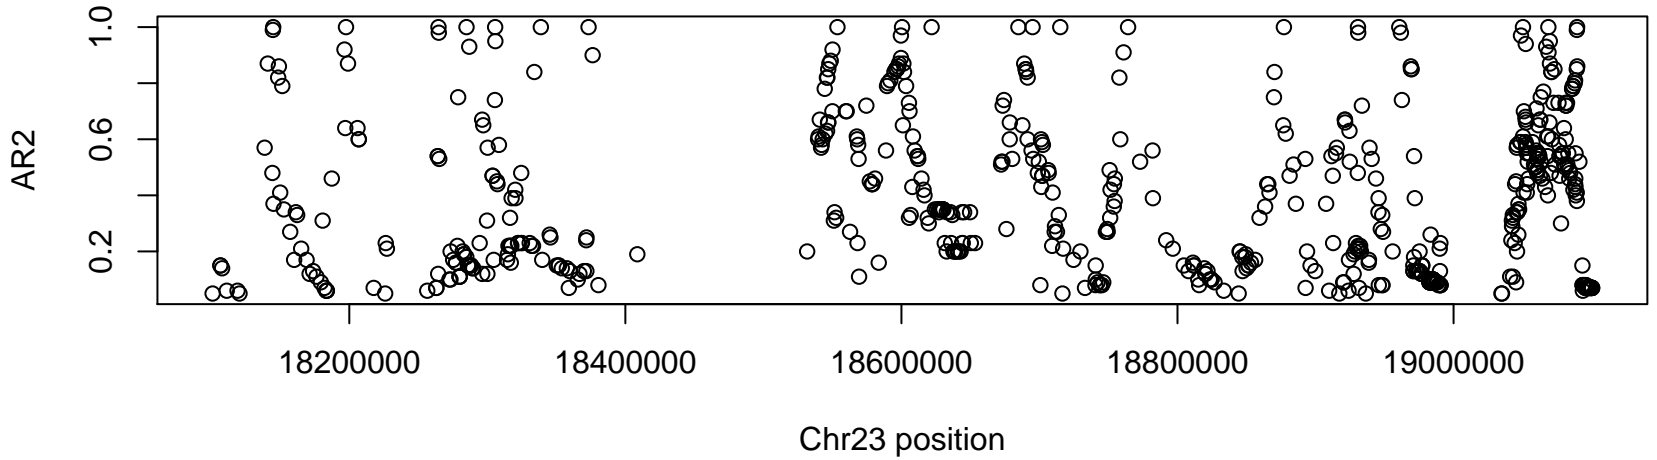

## AR2 distribution of the sequence based imputation

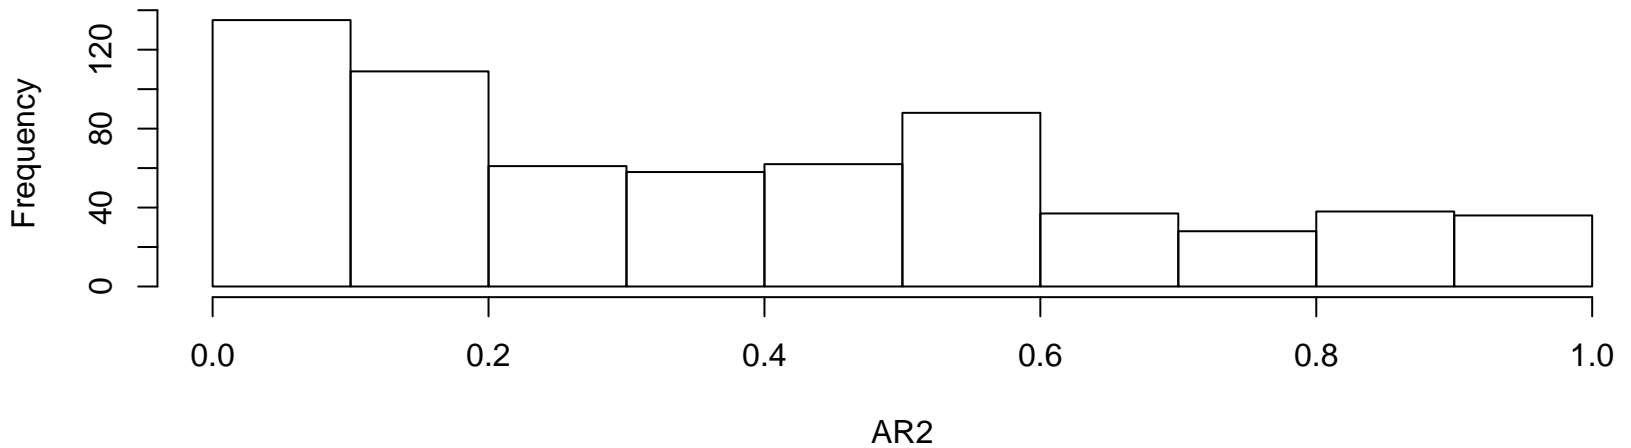

Supplement: 12864_2017_3821_MOESM7_ESM.pdf [file 12864_2017_3821_MOESM7_ESM.pdf]
