# Supplementary material for: Dissection of additive, dominance, and imprinting effects for production and reproduction traits in Holstein cattle
Source: PubMed Central journal article supplement (PMC5450346; doi:10.1186/s12864-017-3821-4), 2017-05-30

**Association of additive effects conditional on add**

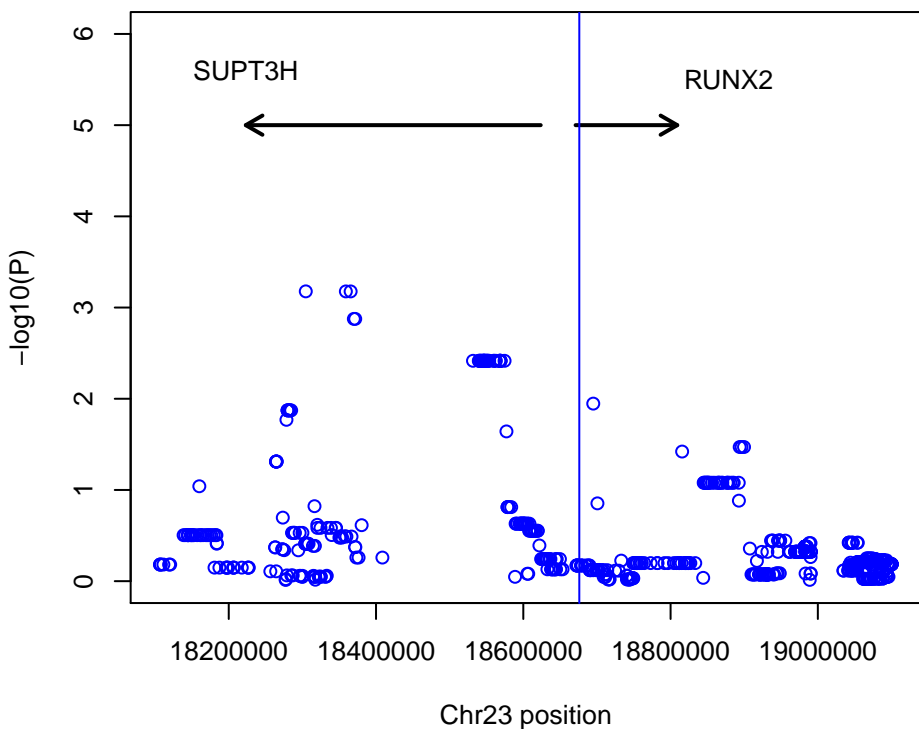

**Association of dominance effects conditional on add**

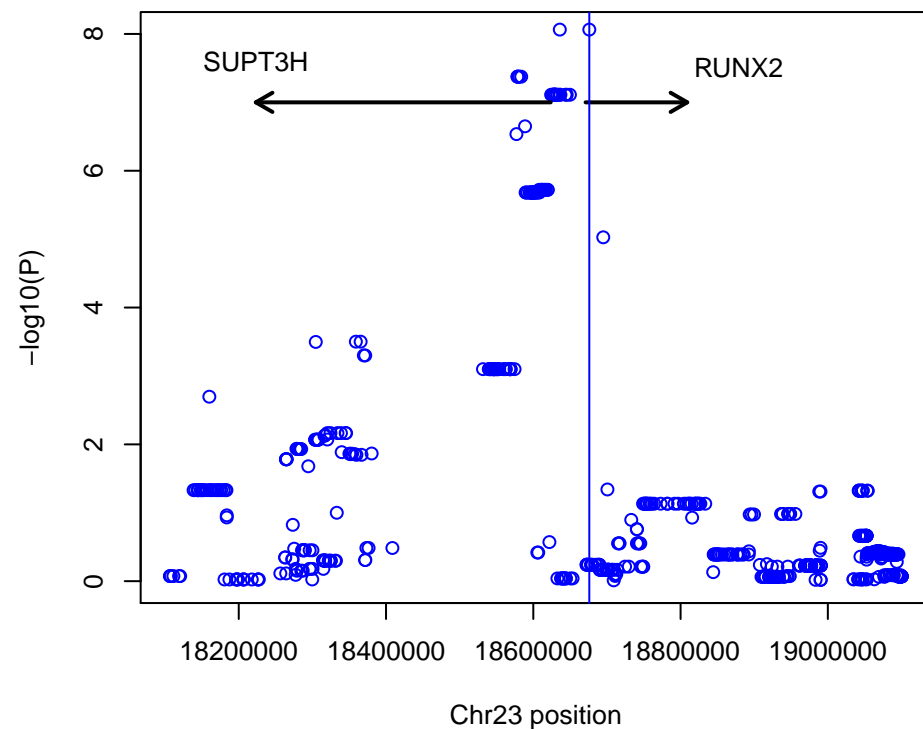

**Association of additive effects conditional on add+dom**

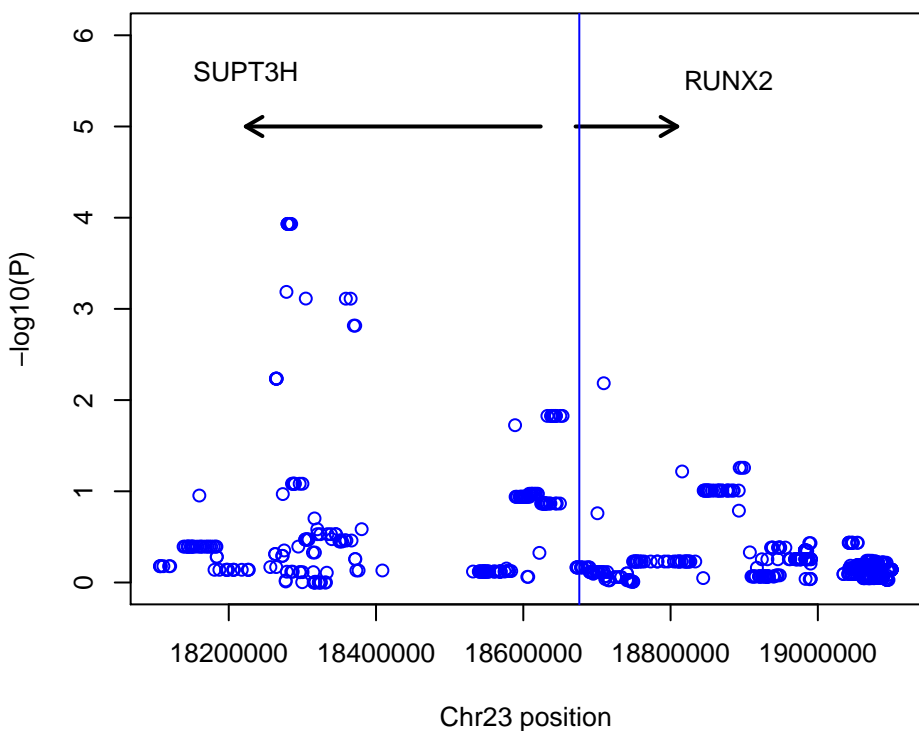

**Association of dominance effects conditional on add+dom**

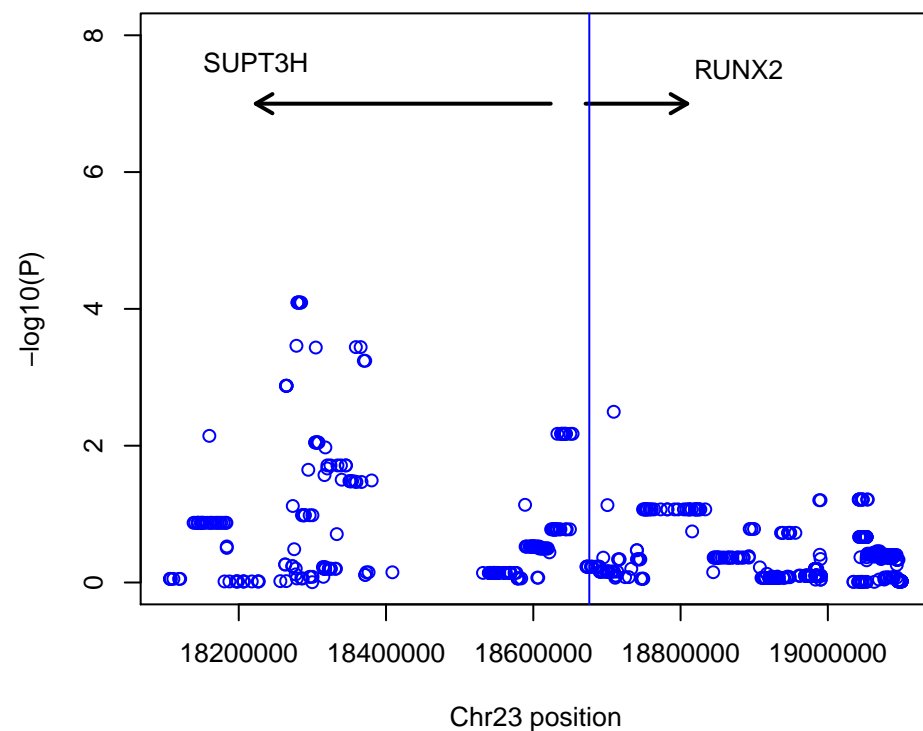

Supplement: 12864_2017_3821_MOESM9_ESM.pdf [file 12864_2017_3821_MOESM9_ESM.pdf]
